# Supplementary material for: Gene-Based Association Tests Using New Polygenic Risk Scores and Incorporating Gene Expression Data
Source: MDPI journal article supplement (doi:10.3390/genes13071120), 2022-06-22

## Supplementary Information

**Figure S1.** Powers of the seven tests versus the total effect size  $\beta$  for a quantitative trait with  $N = 5,000$ . The proportion of causal variants is 0.3. Models 1-3 corresponding to Genes 1-3 where we only use the eQTL with the largest weight to generate gene expression; Models 4-6 corresponding to Genes 1-3 where we use two eQTLs with the first two largest weights to generate gene expression.

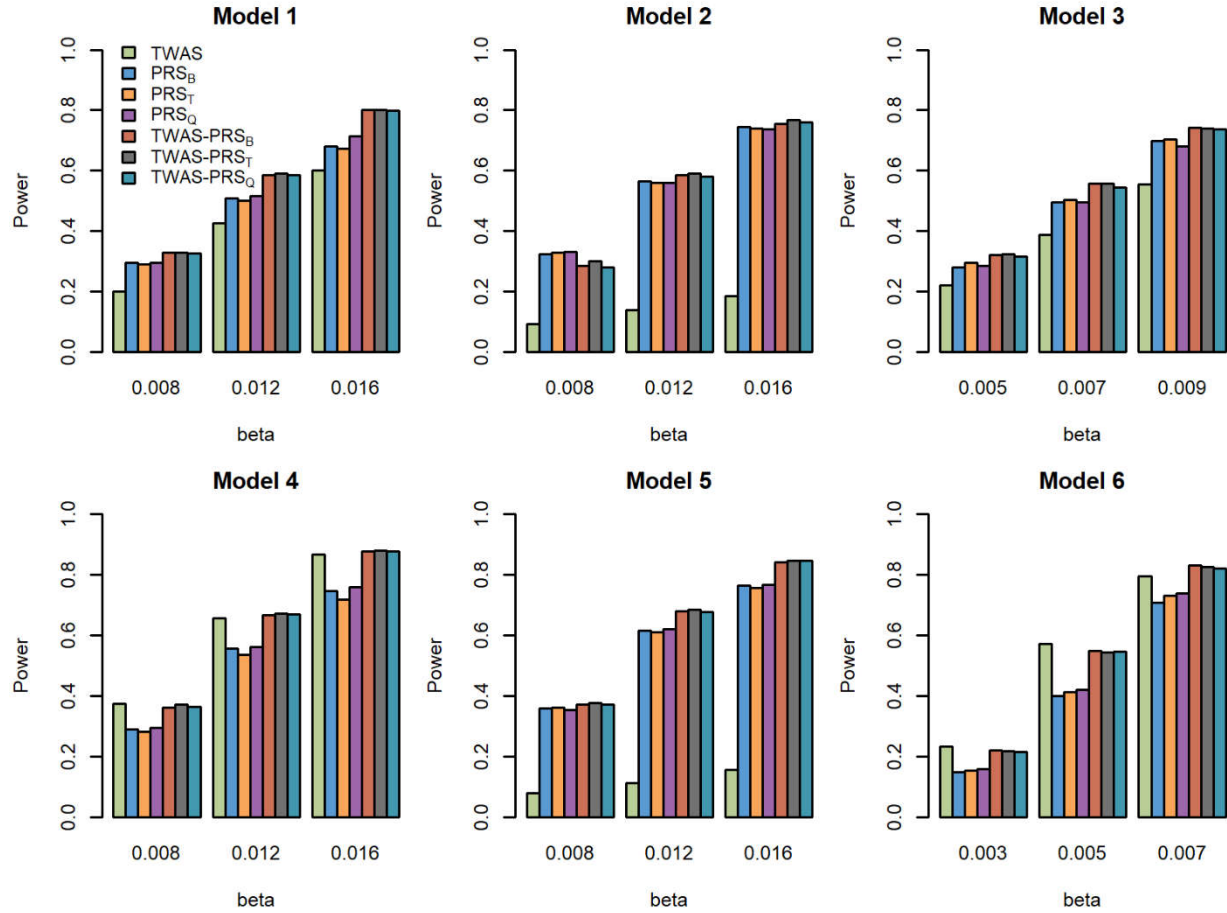

**Figure S2.** Powers of the seven tests versus the total effect size  $\beta$  for a quantitative trait with  $N = 10,000$ . The proportion of causal variants is 0.3. Models 1-3 corresponding to Genes 1-3 where we only use the eQTL with the largest weight to generate gene expression; Models 4-6 corresponding to Genes 1-3 where we use two eQTLs with the first two largest weights to generate gene expression.

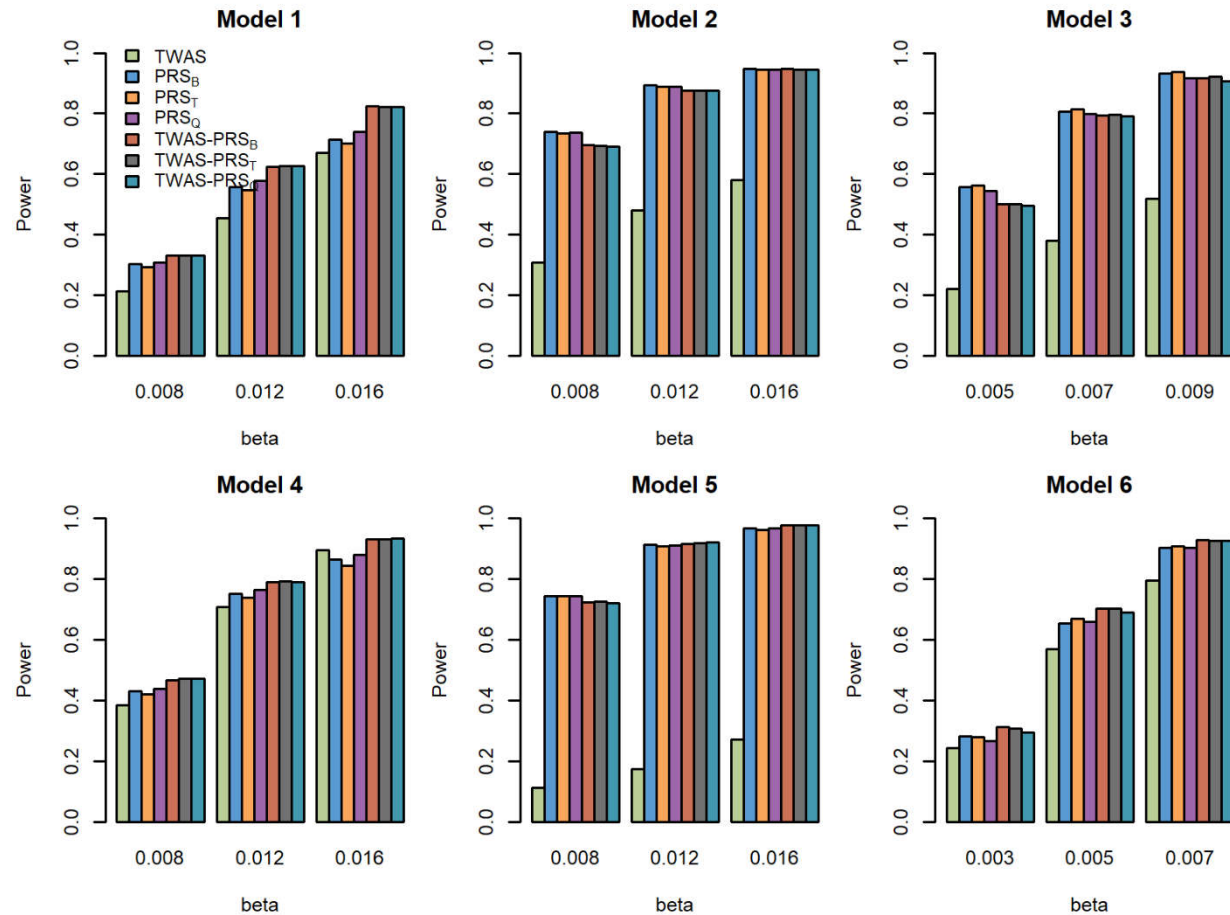

**Figure S3.** Powers of the seven tests versus the total effect size  $\beta$  for a quantitative trait with  $N = 20,000$ . The proportion of causal variants is 0.3. Models 1-3 corresponding to Genes 1-3 where we only use the eQTL with the largest weight to generate gene expression; Models 4-6 corresponding to Genes 1-3 where we use two eQTLs with the first two largest weights to generate gene expression.

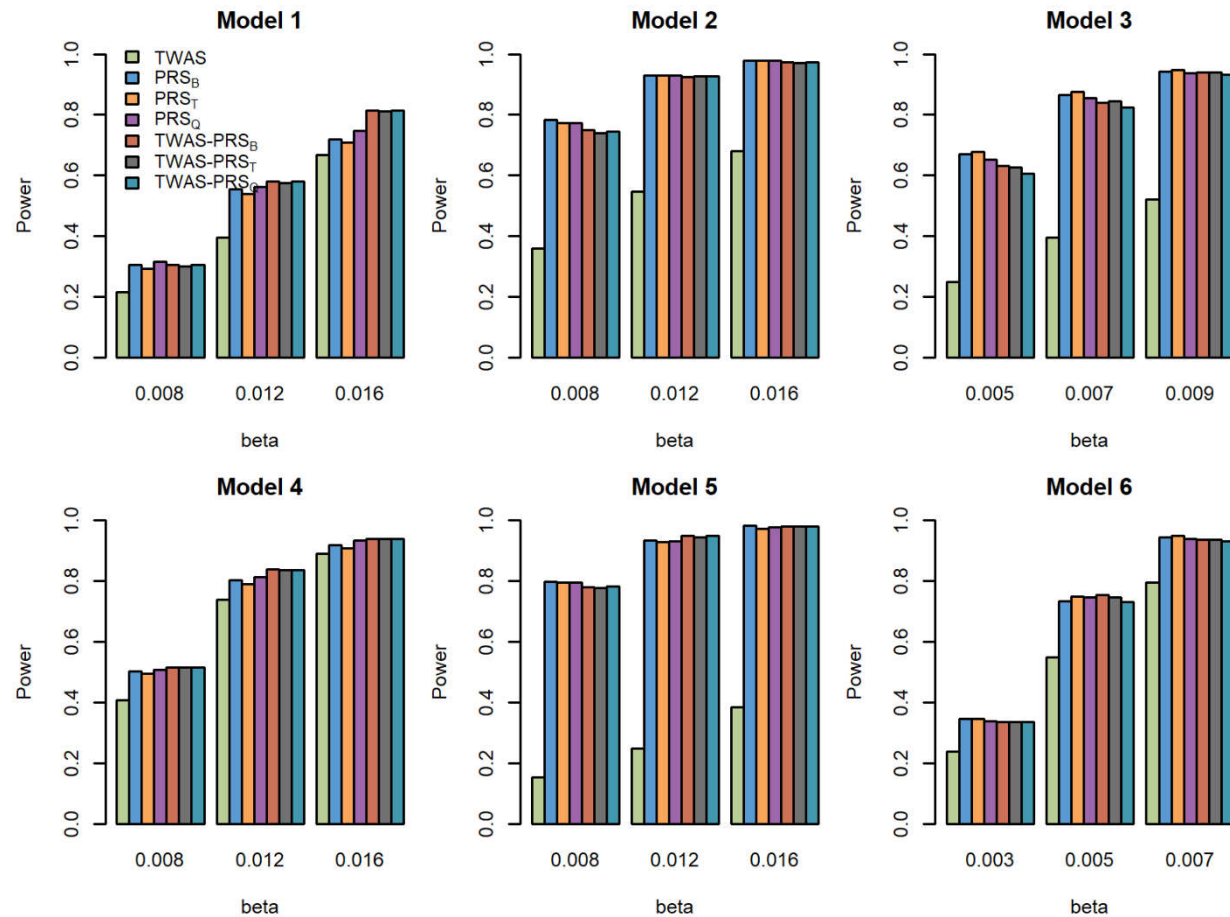

**Figure S4.** Powers of the seven tests versus the total effect size  $\beta$  for a qualitative trait with  $N = 5,000$ . The proportion of causal variants is 0.2. Models 1-3 corresponding to Genes 1-3 where we only use the eQTL with the largest weight to generate gene expression; Models 4-6 corresponding to Genes 1-3 where we use two eQTLs with the first two largest weights to generate gene expression.

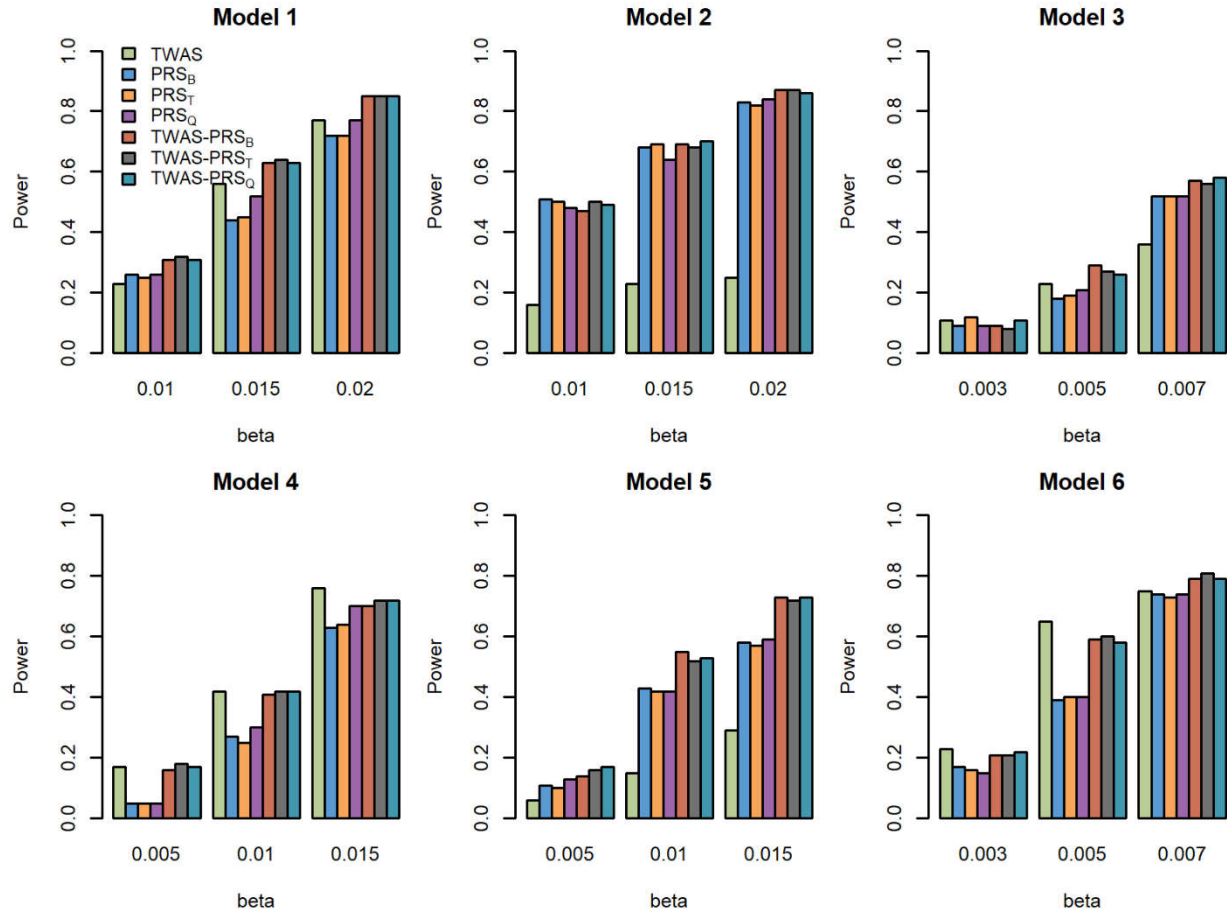

**Figure S5.** Powers of the seven tests versus the total effect size  $\beta$  for a qualitative trait with  $N = 10,000$ . The proportion of causal variants is 0.2. Models 1-3 corresponding to Genes 1-3 where we only use the eQTL with the largest weight to generate gene expression; Models 4-6 corresponding to Genes 1-3 where we use two eQTLs with the first two largest weights to generate gene expression.

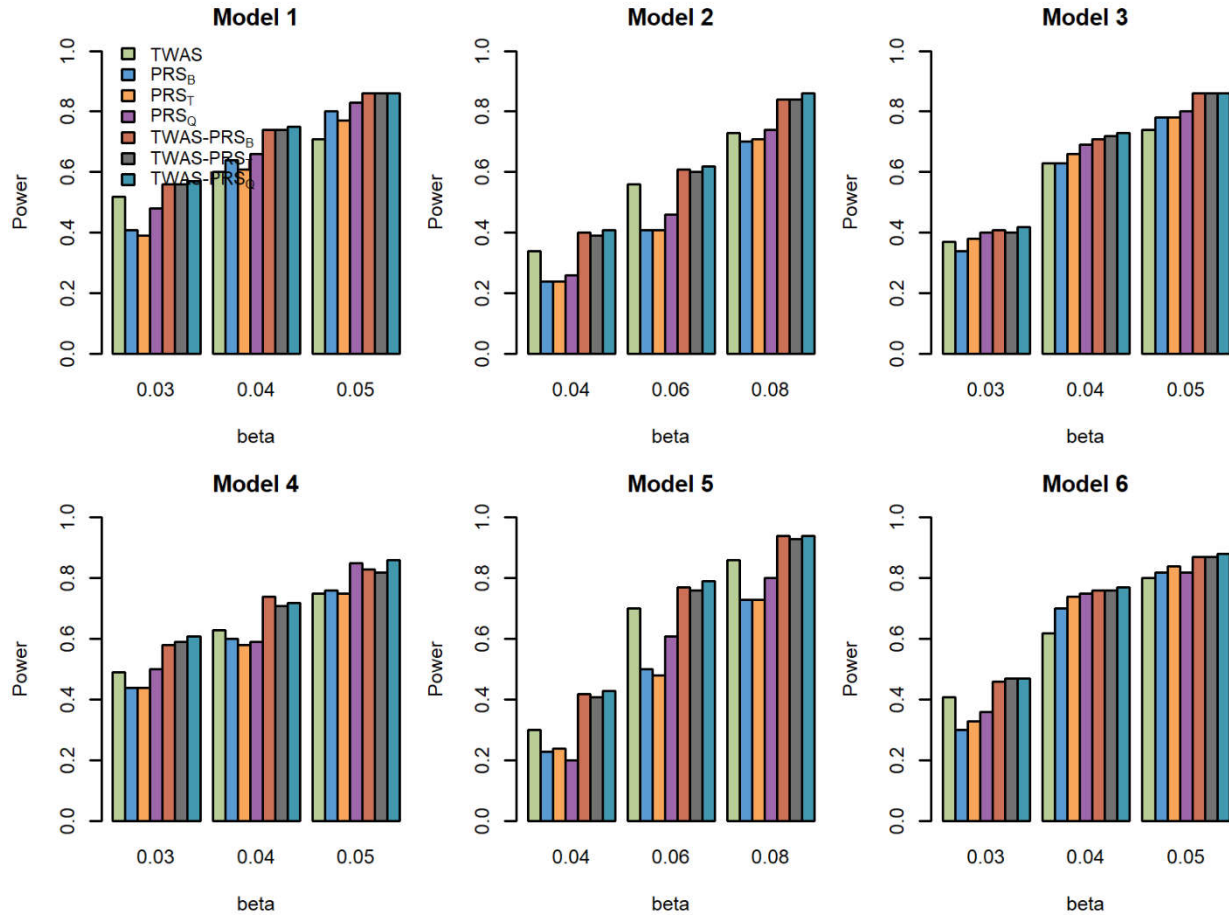

**Figure S6.** Powers of the seven tests versus the total effect size  $\beta$  for a qualitative trait with  $N = 20,000$ . The proportion of causal variants is 0.2. Models 1-3 corresponding to Genes 1-3 where we only use the eQTL with the largest weight to generate gene expression; Models 4-6 corresponding to Genes 1-3 where we use two eQTLs with the first two largest weights to generate gene expression.

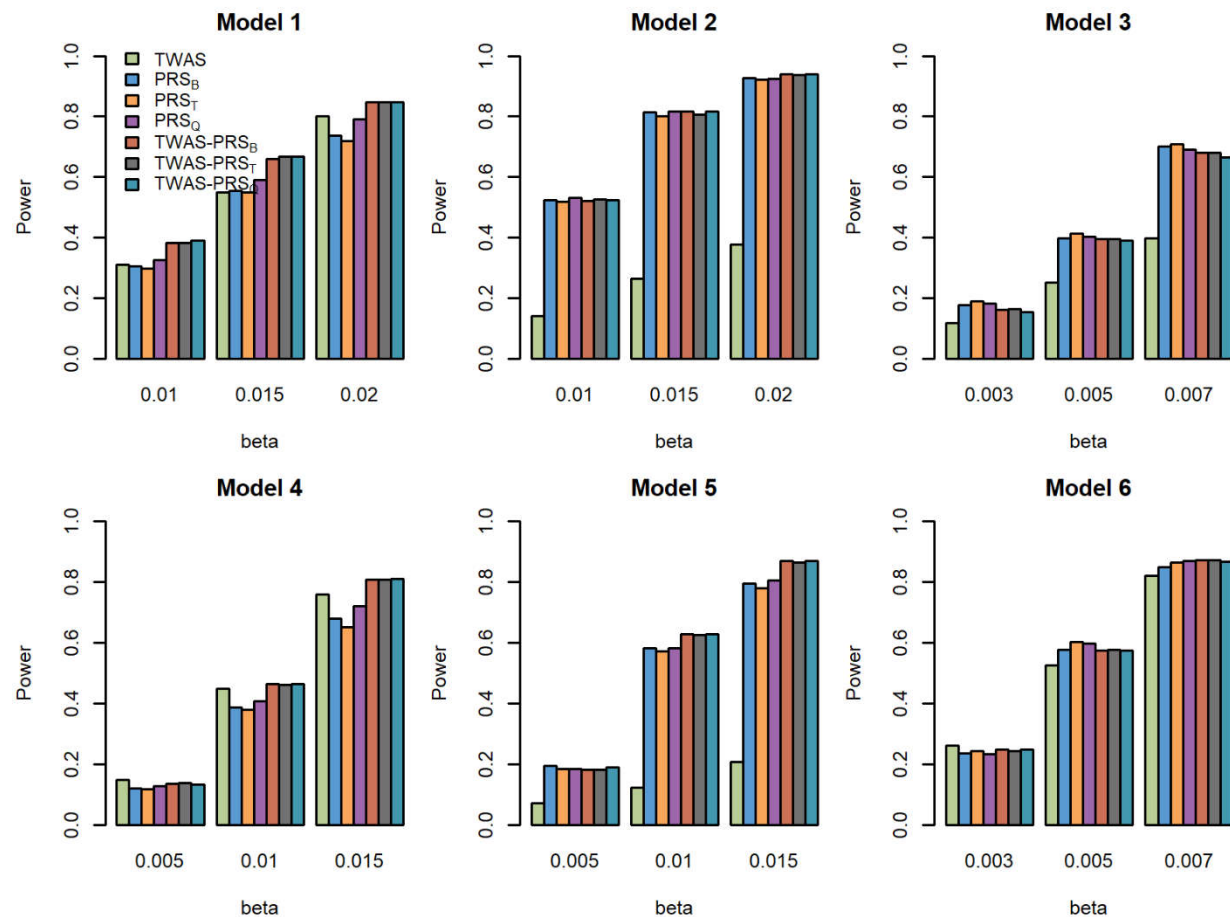

**Figure S7.** Powers of the seven tests versus the total effect size  $\beta$  for a qualitative trait with  $N = 5,000$ . The proportion of causal variants is 0.3. Models 1-3 corresponding to Genes 1-3 where we only use the eQTL with the largest weight to generate gene expression; Models 4-6 corresponding to Genes 1-3 where we use two eQTLs with the first two largest weights to generate gene expression.

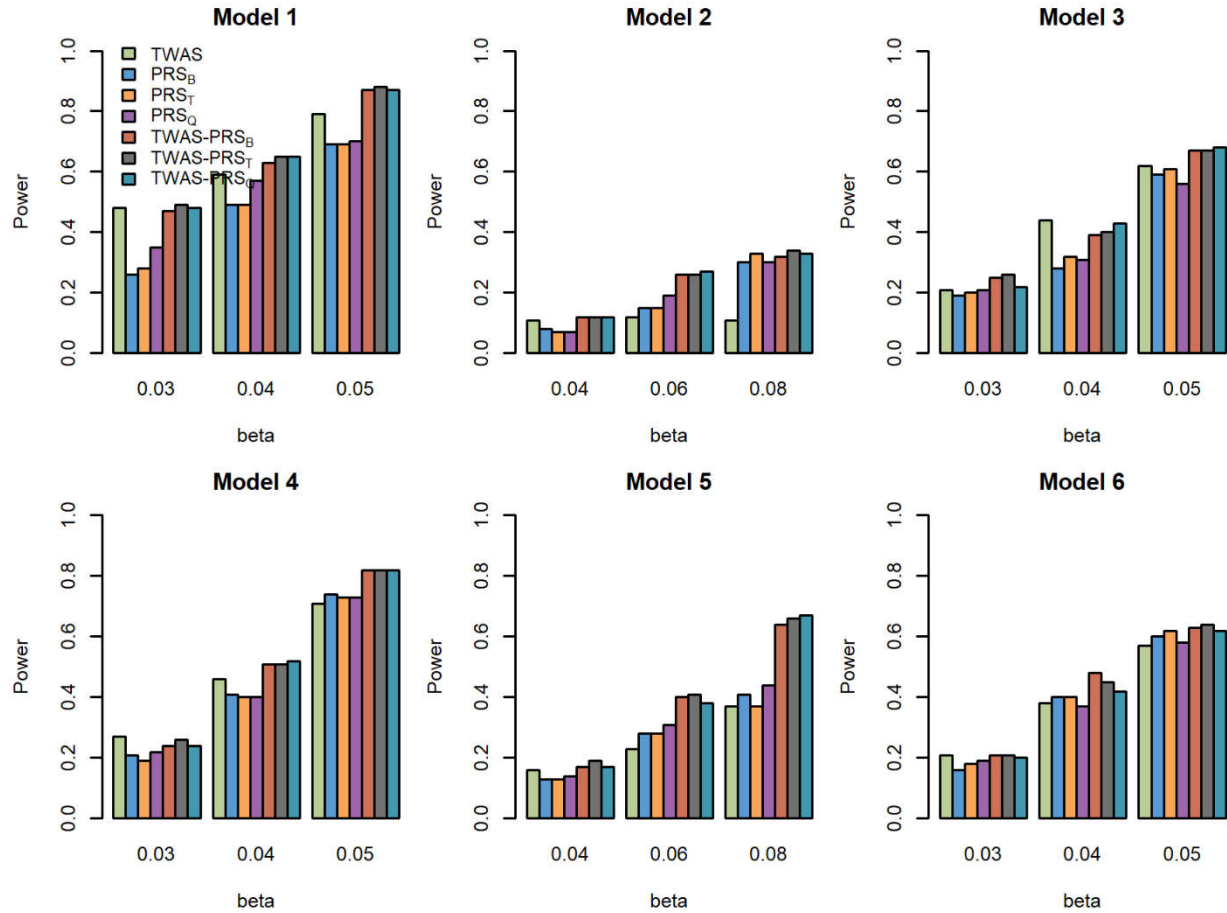

**Figure S8.** Powers of the seven tests versus the total effect size  $\beta$  for a qualitative trait with  $N = 10,000$ . The proportion of causal variants is 0.3. Models 1-3 corresponding to Genes 1-3 where we only use the eQTL with the largest weight to generate gene expression; Models 4-6 corresponding to Genes 1-3 where we use two eQTLs with the first two largest weights to generate gene expression.

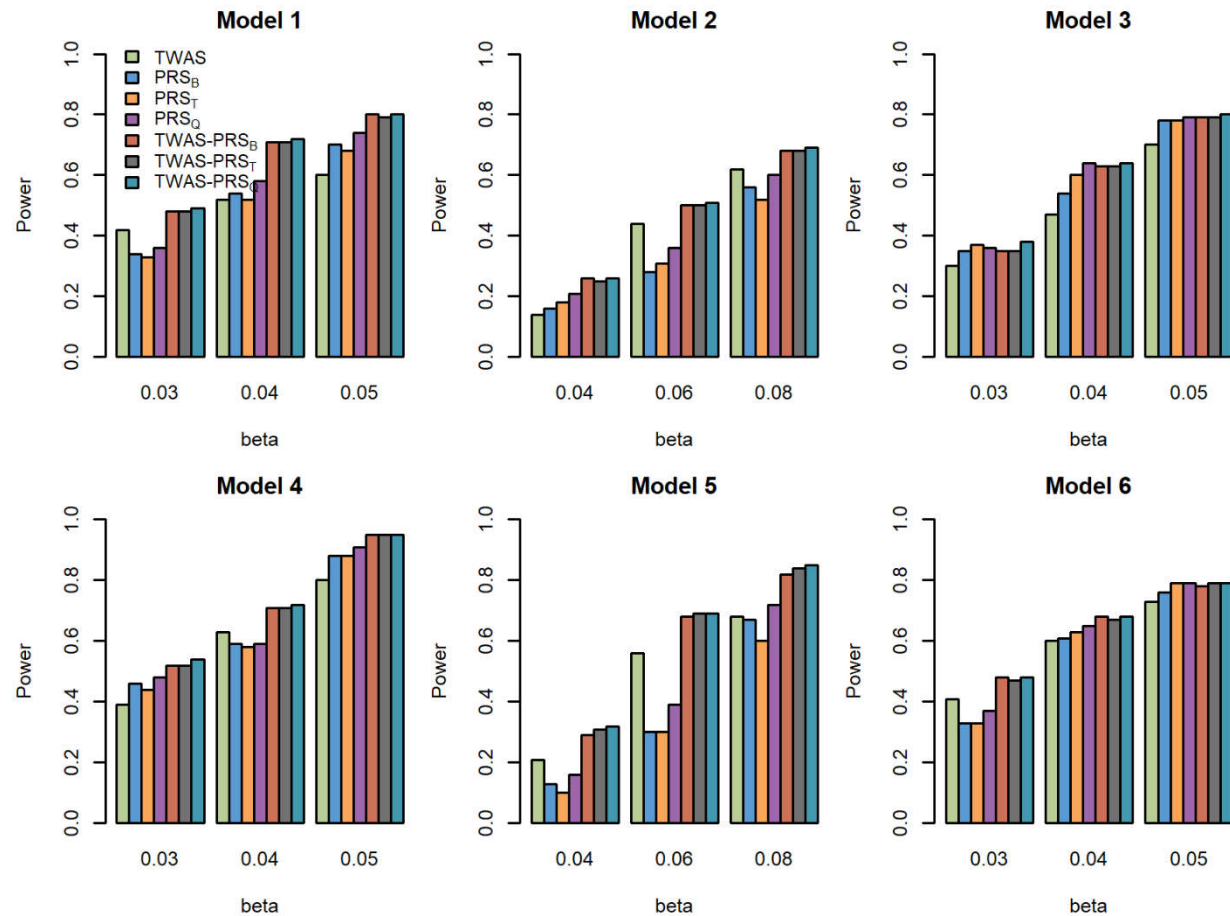



**Figure S9.** Powers of the seven tests versus the total effect size  $\beta$  for a qualitative trait with  $N = 20,000$ . The proportion of causal variants is 0.3. Models 1-3 corresponding to Genes 1-3 where we only use the eQTL with the largest weight to generate gene expression; Models 4-6 corresponding to Genes 1-3 where we use two eQTLs with the first two largest weights to generate gene expression.

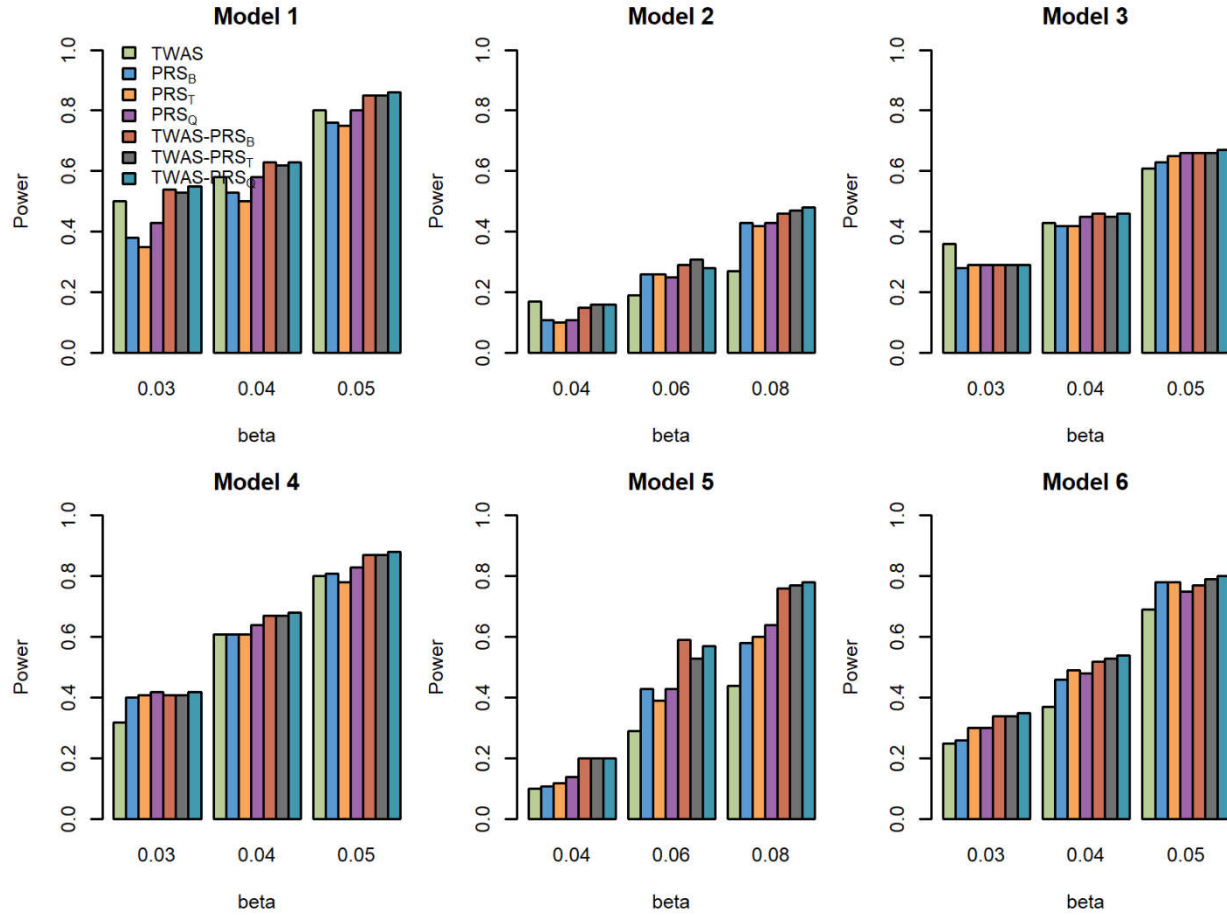

Supplement: s1 [file s1]
